# Supplementary material for: Defects in B-lymphopoiesis and B-cell maturation underlie prolonged B-cell depletion in ANCA-associated vasculitis
Source: PubMed Central journal article supplement — Ann Rheum Dis. 2024 Jun 8;83(11):e225587. doi: 10.1136/ard-2024-225587 (PMC11503191; doi:10.1136/ard-2024-225587), 2024-06-08

## Supplemental Information

Thiel, Schmidt et al.

### Supplemental Figure Legend

Supplemental figure 1:

(A) Correlation of RTX sum dose (g) with duration of B cell depletion (months). (B) Concentration of serum immunoglobulins measured in patients' serum is correlated with the duration of B cell depletion in months after RTX treatment. (C) Effect of different maintenance treatment on the duration of B cell depletion after RTX treatment. (D) Absolute B cell count/ $\mu$ l blood in RTX-treated AAV patients divided by disease type. (E) Absolute B cell count/ $\mu$ l blood and duration of B cell depletion after RTX treatment in RTX-treated AAV patients divided by CYC treatment. (F) Correlation of creatinine (mg/dl) and (G) of eGFR (ml/min/1.73qm) with duration of B cell depletion (months). Data was analyzed using Kruskal-Wallis test, corrected for multiple comparisons by Dunn's multiple comparison tests or Mann-Whitney test and depicted as \* $p < 0.05$ , \*\* $p < 0.01$ . Correlation analysis was performed by nonparametric spearman correlation.

Supplemental figure 2:

(A) Gating strategy to analyze peripheral B cell subpopulations. CD19<sup>+</sup> B cells were gated on after doublet and dead cell exclusion in lymphocytes. (B) Peripheral subpopulations were analyzed dividing the AAV patients according to their diagnosis (GPA, MPA or EGPA). B cell subpopulations are shown in treatment-naïve patients compared to HD. Patients are treatment-naïve for immunosuppressive treatment except for short-term glucocorticoids. Absolute count/ $\mu$ l blood and frequency within total B cells of Transitional B cells (IgM<sup>++</sup>CD38<sup>++</sup>), Naive B cells (IgD<sup>+</sup>CD27<sup>-</sup>), Marginal Zone-like B cells (MZ, IgD<sup>+</sup>CD27<sup>+</sup>), Switched memory B cells (IgD<sup>-</sup>CD27<sup>+</sup>), Double negative B cells (DN, IgD<sup>-</sup>CD27<sup>-</sup>), and Plasmablasts (CD38<sup>++</sup>CD27<sup>++</sup>). (C) Frequency of switched immunoglobulin subclasses<sup>+</sup> in IgM<sup>-</sup>IgD<sup>-</sup> B cells in HD and treatment-naïve patients. Data was analyzed using Kruskal-Wallis test, corrected for multiple comparisons by Dunn's multiple comparison tests or Mann-Whitney test and depicted as \* $p < 0.05$ , \*\* $p < 0.01$ , \*\*\* $p < 0.001$ .

Supplemental figure 3:

(A) Peripheral subpopulations were analyzed dividing the AAV patients according to their diagnosis (GPA, MPA or EGPA). B cell subpopulations are shown in patients that received RTX-induction therapy compared to HD. Patients received either no additional DMARD or either MTX or LEF or AZA or MMF maintenance therapy at time of analysis. Absolute count/ $\mu$ l blood and frequency within total B cells of Transitional B cells (IgM<sup>++</sup>CD38<sup>++</sup>), Naive B cells (IgD<sup>+</sup>CD27<sup>-</sup>), Marginal Zone-like B cells (MZ, IgD<sup>+</sup>CD27<sup>+</sup>), Switched memory B cells (IgD<sup>-</sup>CD27<sup>+</sup>), Double negative B cells (DN, IgD<sup>-</sup>CD27<sup>-</sup>), and Plasmablasts (CD38<sup>++</sup>CD27<sup>++</sup>).

(B) Switched immunoglobulin subclass expression was analyzed within IgM<sup>-</sup>IgD<sup>-</sup> switched B cells. Data was analyzed using Kruskal-Wallis test, corrected for multiple comparisons by Dunn's multiple comparison tests and depicted as \*p < 0.05, \*\*p < 0.01, \*\*\*p < 0.001, \*\*\*\*p < 0.0001.

Supplemental figure 4:

(A) Representative flow plot of CD86 expression (left) and bar graph of MFI of CD86 (right) in B cells. (B) Representative flow plots of CD95 expression (left) and bar graphs of frequency of CD95<sup>+</sup> (right) in naïve and switched memory B cells. Data was analyzed using Kruskal-Wallis test, corrected for multiple comparisons by Dunn's multiple comparison tests and depicted as \*p < 0.05, \*\*p < 0.01, \*\*\*p < 0.001, \*\*\*\*p < 0.0001.

Supplemental figure 5:

(A) Gating strategy of B cell populations in CyTOF analyzed BM samples of HD and AAV. (B, C) Ex vivo BM B cells were also analyzed by flow cytometry. (B) Representative flow plots of CD10<sup>+</sup>CD38<sup>+</sup> lymphoid precursors and CLP/pro-B, pre-B and immature B cells in HD (upper row) and AAV (lower row). (C) Frequency of CD34<sup>+</sup> and CD10<sup>+</sup>CD38<sup>+</sup> cells in live and frequency of CLP/pro-B, pre-B and immature B cells in CD10<sup>+</sup>CD38<sup>+</sup> cells. (D) Frequency of CD33<sup>+</sup> cells within live cells over time in *in vitro* culture of early B cell development from CD34<sup>+</sup> BM cells. (C) Filled circles: treatment-naïve except for short-term glucocorticoids; empty triangle: CYC+ high-dose prednisolone; empty square: RTX-induction therapy + MTX maintenance therapy. Data was analyzed using Mann-Whitney test and depicted as \*p < 0.05, \*\*p < 0.01, \*\*\*p < 0.001.

Supplemental figure 6:

(A) Median fluorescence intensity (MFI) of BAFF-R in peripheral B cell subpopulations in HD and treatment-naïve AAV patients. (B) Median fluorescence intensity (MFI) of BAFF-R in peripheral B cell subpopulations in HD and AAV patients that received RTX-induction treatment and either no additional DMARD or either MTX or LEF or AZA or MMF maintenance therapy at time of analysis. (C) BAFF-R expression in non-Plasmablasts in HD and AAV without and with acidic elution of BAFF before the staining. Data was analyzed using Kruskal-Wallis test, corrected for multiple comparisons by Dunn's multiple comparison tests or Mann-Whitney test and depicted as \* $p < 0.05$ , \*\* $p < 0.01$ , \*\*\* $p < 0.001$ , \*\*\*\* $p < 0.0001$ .

Supplemental Table S1

| Marker | Clone      | Fluorophore      | Supplier                |
|--------|------------|------------------|-------------------------|
| CD95   | DX2        | BV421            | BD                      |
| CD3    | OKT3       | SB 436           | Life Technologies       |
| CD16   | 3G8        | SB 436           | Invitrogen              |
| CD33   | WM-53      | SB 436           | Invitrogen              |
| CD20   | 2H7        | PB               | BioLegend               |
| CD69   | FN50       | BV 480           | BD Bioscience           |
| BAFF-R | 11C1       | BV 605           | BD                      |
| CD38   | HB-7       | BV 650           | BioLegend               |
| CD27   | L128       | BV 786           | BD                      |
| IgG2   | SAG2       | FITC             | Cytognos                |
| IgG3   | SAG3       | FITC             | Cytognos                |
| IgG1   | SAG1       | PE               | Cytognos                |
| IgG2   | SAG2       | PE               | Cytognos                |
| TACI   | 1A1        | PE/Dazzle 594    | BioLegend               |
| IgA1   | SAA1       | PerCP-Cy5.5      | Cytognos                |
| IgA2   | SAA2       | PerCP-Cy5.5      | Cytognos                |
| IgD    | IA6-2      | PerCP-eFluor 710 | Invitrogen              |
| IgE    | MHE-18     | PE-Cy7           | BioLegend               |
| IgG4   | SAG4       | APC              | Cytognos                |
| IgA1   | SAA1       | APC              | Cytognos                |
| IgM    | polyclonal | AlexaFlour 647   | Jackson Immuno Research |
| CD21   | Bu32       | AlexaFlour 700   | BioLegend               |
| zombie |            | zombie NIR       | BioLegend               |
| CD19   | HIB19      | APC-Cy7          | BioLegend               |

Supplemental Table S2

| marker                          | clone   | tag    | µl per 100 µl cell suspension | manufacturer |
|---------------------------------|---------|--------|-------------------------------|--------------|
| <b>BARCODES</b>                 |         |        |                               |              |
| CD45                            | HI30    | Y89    | 1                             | Fluidigm     |
| HLA-I                           | W6/32   | 106Cd  | 1                             | Bxcell       |
| CD45                            | MEM-28  | 110Cd  | 2                             | Exbio        |
| CD45                            | MEM-28  | 113In  | 1                             | Exbio        |
| HLA-I                           | W6/32   | 116Cd  | 2                             | Bxcell       |
| HLA-I                           | W6/32   | 175Lu  | 1                             | Bxcell       |
| HLA-I                           | W6/32   | 198Pt  | 1                             | Bxcell       |
| CD45                            | MEM-28  | 194Pt  | 2                             | Exbio        |
| <b>SURFACE MARKERS</b>          |         |        |                               |              |
| IgM                             | MHM-88  | 144Nd  | 1                             | BioLegend    |
| CD24                            | ML5     | 145Nd  | 2                             | BioLegend    |
| CD34                            | 581     | 148Nd  | 2                             | Fluidigm     |
| CD127                           | A019D5  | 149Sm  | 2                             | Fluidigm     |
| CD38                            | HIT2    | 141Pr  | 2                             | Exbio        |
| IgD                             | IA6-2   | 146Nd  | 1                             | Fluidigm     |
| CD20                            | 2H7     | 147Sm  | 1                             | Fluidigm     |
| Anti- Human IgG lambda          | MHL-38  | 151Eu  | 1                             | Fluidigm     |
| CD135                           | BV10A4  | 156Gd  | 4                             | Exbio        |
| CD10                            | HI10a   | 158Gd  | 1                             | Fluidigm     |
| CD22                            | HIB22   | 159Tb  | 2                             | Fluidigm     |
| Anti- Human IgG kappa           | MHK-49  | 160Gd  | 1                             | Fluidigm     |
| CD9                             | MEM-61  | 161Dy  | 2                             | Exbio        |
| CD25                            | MEM-181 | 162Dy  | 4                             | Exbio        |
| CD44                            | MEM-85  | 163Dy  | 2                             | Exbio        |
| CD27                            | L128    | 167Er  | 1                             | Fluidigm     |
| CD19                            | HIB19   | 169Tm  | 2                             | Fluidigm     |
| CXCR5                           | REA103  | 171Yb  | 2                             | Miltenyi     |
| CXCR4                           | REA649  | 173Yb  | 2                             | Miltenyi     |
| HLA-DR                          | L243    | 174Yb  | 1                             | Fluidigm     |
| CD73                            | AD2     | 176Yb  | 2                             | Exbio        |
| <b>LINEAGE NEGATIVE MARKERS</b> |         |        |                               |              |
| CD3                             | UCHT1   | biotin | 2                             | Exbio        |
| CD16                            | 3G8     | biotin | 2                             | BioLegend    |
| CD33                            | HIM3-4  | biotin | 2                             | Exbio        |
| CD66b                           | G10F5   | biotin | 2                             | BioLegend    |
| <b>INTRACELLULAR MARKERS</b>    |         |        |                               |              |
| Caspase 3 (Cleaved)             | D3E9    | 142Nd  | 2                             | Fluidigm     |
| cPARP                           | F21-852 | 143Nd  | 1                             | Fluidigm     |
| PAX-5                           | 1H9     | 150Nd  | 2                             | BioLegend    |
| Caspase 7 (Cleaved)             | D6H1    | 152Sm  | 1                             | Fluidigm     |

|        |           |       |   |          |
|--------|-----------|-------|---|----------|
| BCL-2  | Bcl-2/100 | 153Eu | 2 | Exbio    |
| Tdt    | E17-1519  | 164Dy | 1 | Fluidigm |
| Biotin | 1D4-C5    | 165Ho | 1 | Fluidigm |
| Ki-67  | B56       | 168Er | 1 | Fluidigm |
| CD79a  | HM57      | 170Er | 2 | Exbio    |
| IgM    | MHM-88    | 172Yb | 1 | Fluidigm |

Supplemental Table S3

| <b>FACS Canto II Panel</b> |                      |                                            |                                  |                      |
|----------------------------|----------------------|--------------------------------------------|----------------------------------|----------------------|
| <b>Marker</b>              | <b>Clone</b>         | <b>Fluorophore</b>                         | <b>Supplier</b>                  | <b>Panel version</b> |
| CD10                       | HI10a<br>W8E7        | FITC                                       | BioLegend<br>BD                  | v1, v2               |
| IgD                        |                      | PE                                         | Southern Biotech                 | v1, v2               |
| CD33                       | WM53                 | PerCP-Cy5.5                                | BioLegend                        | v1                   |
| CD34                       | 581                  | PE-Cy7                                     | BioLegend                        | v1, v2               |
| IgM                        |                      | AlexaFluor 647                             | Jackson Immuno Research          | v1, v2               |
| CD19                       | HIB19                | APC-Cy7<br>BV510                           | BioLegend                        | v1<br>v2             |
| CD38                       | HIT2<br>HB-7         | Pacific Blue<br>PerCP-Cy5.5                | Exbio<br>BioLegend               | v1<br>v2             |
| zombie                     |                      | Zombie Aqua<br>Zombie NIR                  | BioLegend                        | v1<br>v2             |
| <b>Cytek Aurora Panel</b>  |                      |                                            |                                  |                      |
| <b>Marker</b>              | <b>Clone</b>         | <b>Fluorophore</b>                         | <b>Supplier</b>                  | <b>Panel version</b> |
| CD33                       | WM53                 | PerCP-Cy5.5<br>SuperBright 436             | BioLegend<br>Invitrogen          | v1, v2<br>v3         |
| CD10                       | HI10a                | BV711<br>FITC                              | BioLegend                        | v1, v2<br>v3         |
| IgD                        | IA6-2                | PE-Dazzle 594                              | BioLegend                        | v1, v3               |
| CD38                       | HB-7<br>HIT2<br>HB-7 | PE-Cy7<br>Pacific Blue<br>PerCP-eFluor 710 | BioLegend<br>Exbio<br>Invitrogen | v1<br>v2<br>v3       |
| CD34                       | 561<br>581           | APC<br>PE-Cy7                              | BioLegend                        | v1<br>v2, v3         |
| IgM                        | MHM-88               | BV605                                      | BioLegend                        | v1, v2, v3           |
| zombie                     |                      | zombie NIR                                 | BioLegend                        | v1, v2, v3           |
| CD19                       | HIB19                | APC-Cy7                                    | BioLegend                        | v1, v2, v3           |

Supplemental Table S4

| <b>Marker</b> | <b>Clone</b> | <b>Fluorophore</b> | <b>Supplier</b>         |
|---------------|--------------|--------------------|-------------------------|
| CD11c         | S-HCL-3      | BV 421             | BioLegend               |
| BAFF-R        | 11C1         | BV 605             | BD                      |
| IgG           | G18-145      | BV 650             | BD                      |
| CD27          | L128         | BV 786             | BD                      |
| IgM           | MHM-88       | AlexaFlour 488     | BioLegend               |
| ADAM17        | 111633       | PE                 | R&D Systems             |
| TACI          | 1A1          | PE/Dazzle 594      | BioLegend               |
| CD86          | IT2.2        | PerCP-Cy5.5        | BioLegend               |
| IgD           | IA6-2        | PerCP-eFluor 710   | Invitrogen              |
| CD38          | HB-7         | PE-Cy7             | BioLegend               |
| ADAM10        | SHM14        | APC                | BioLegend               |
| IgA           |              | AlexaFlour 647     | Jackson Immuno Research |
| CD21          | Bu32         | AlexaFlour 700     | BioLegend               |
| zombie        |              | zombie NIR         | BioLegend               |
| CD19          | HIB19        | APC-Cy7            | BioLegend               |

**A**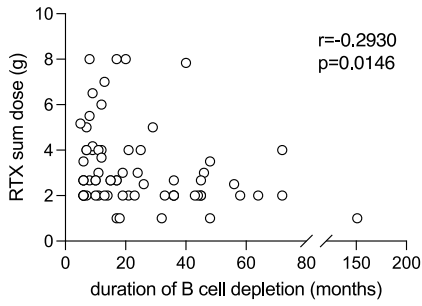**B**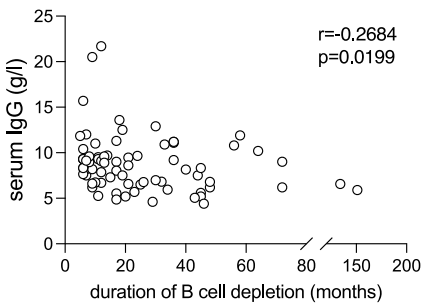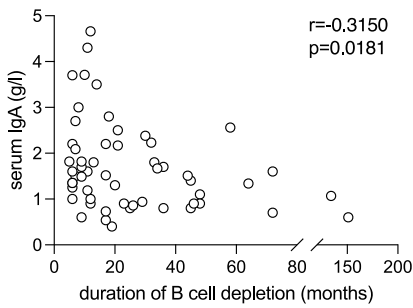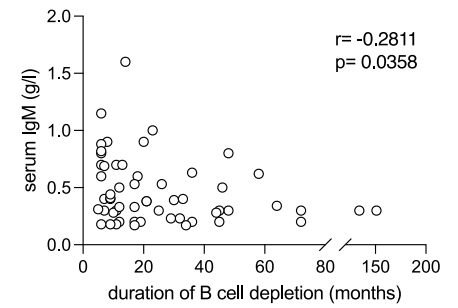**C**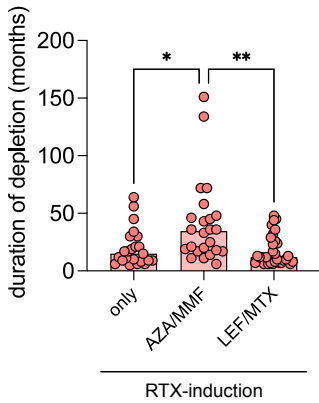**D**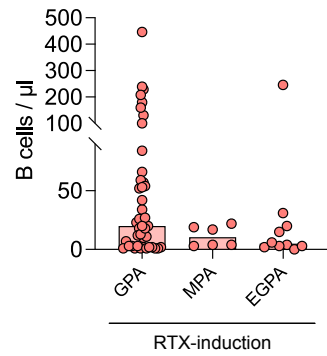**E**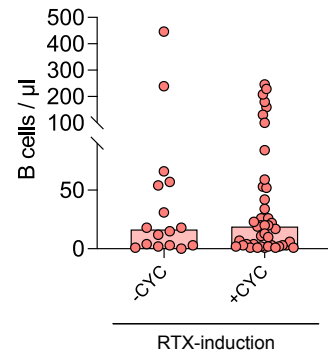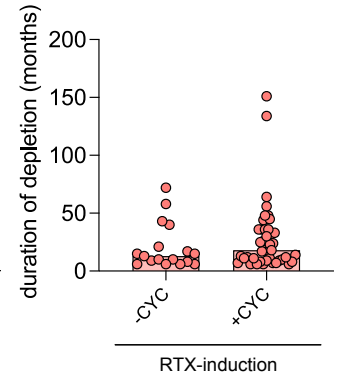**F**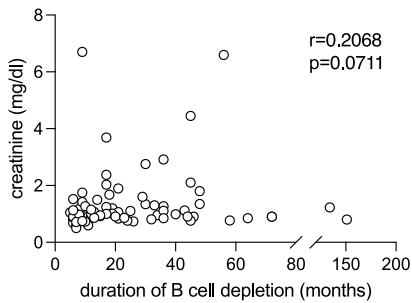**G**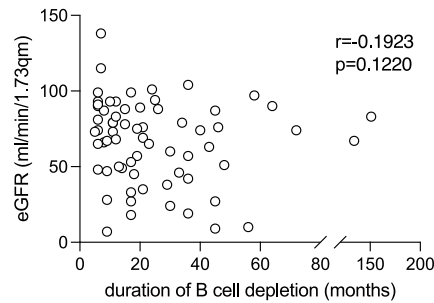

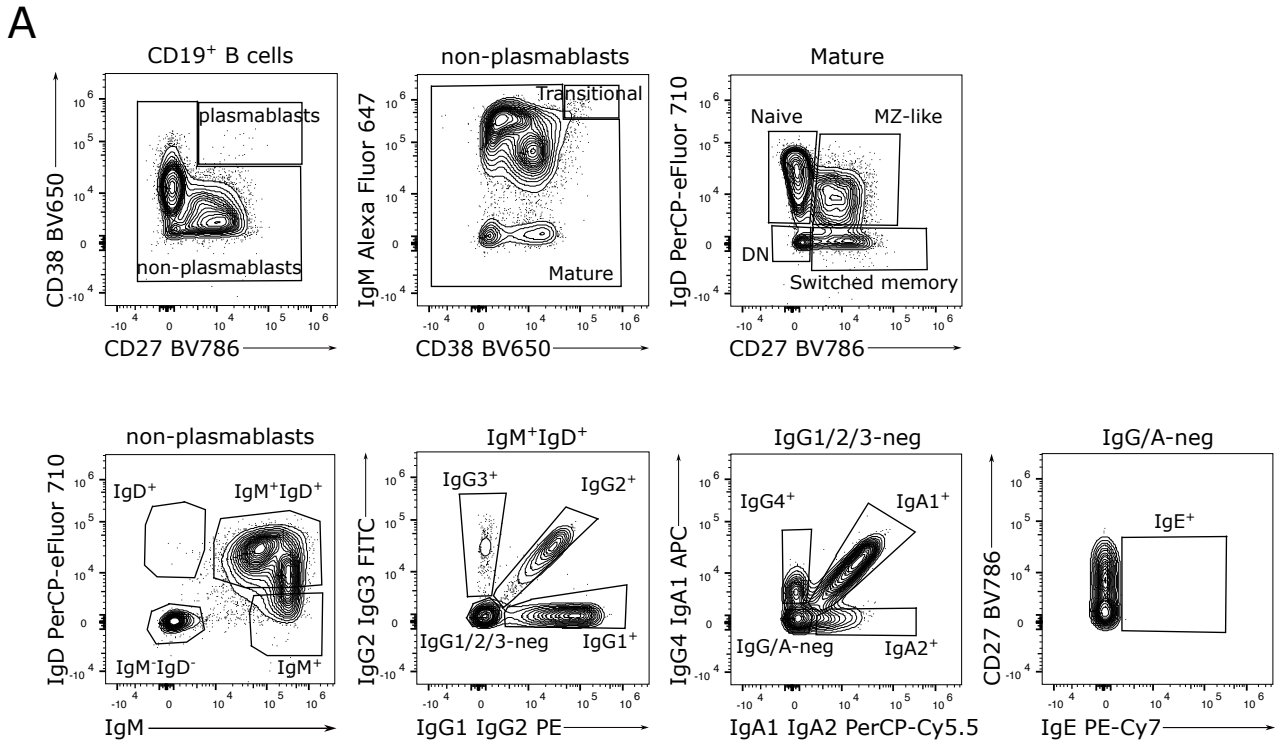

**B Treatment-naive**

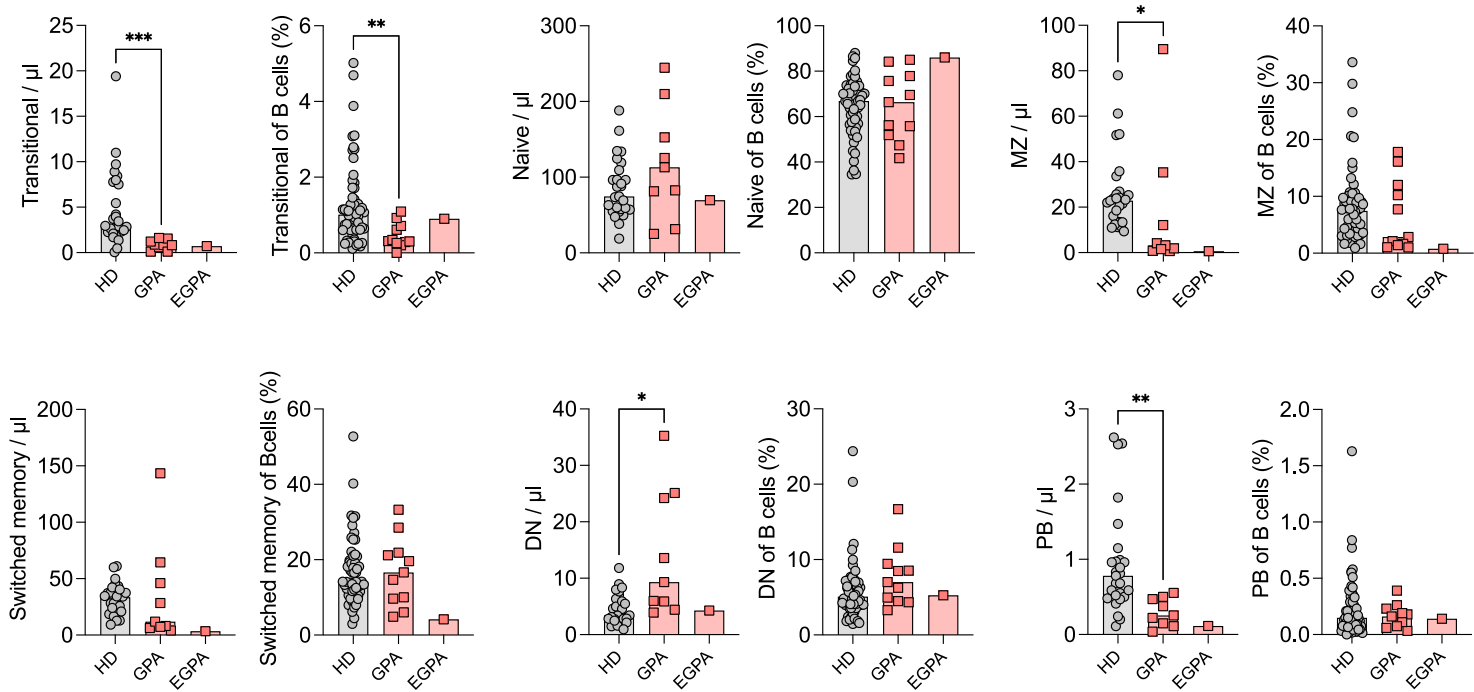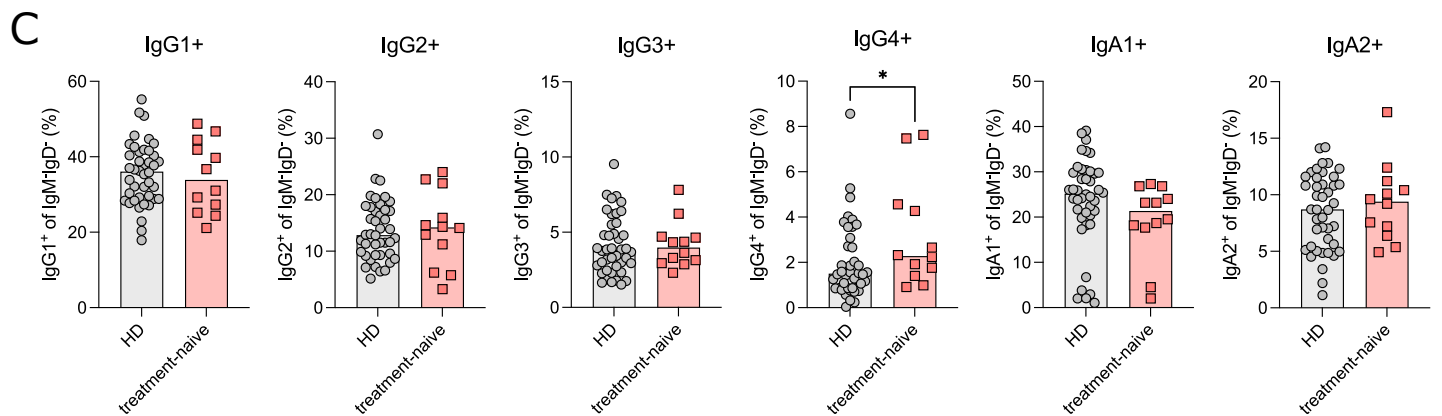



# A RTX-induction therapy

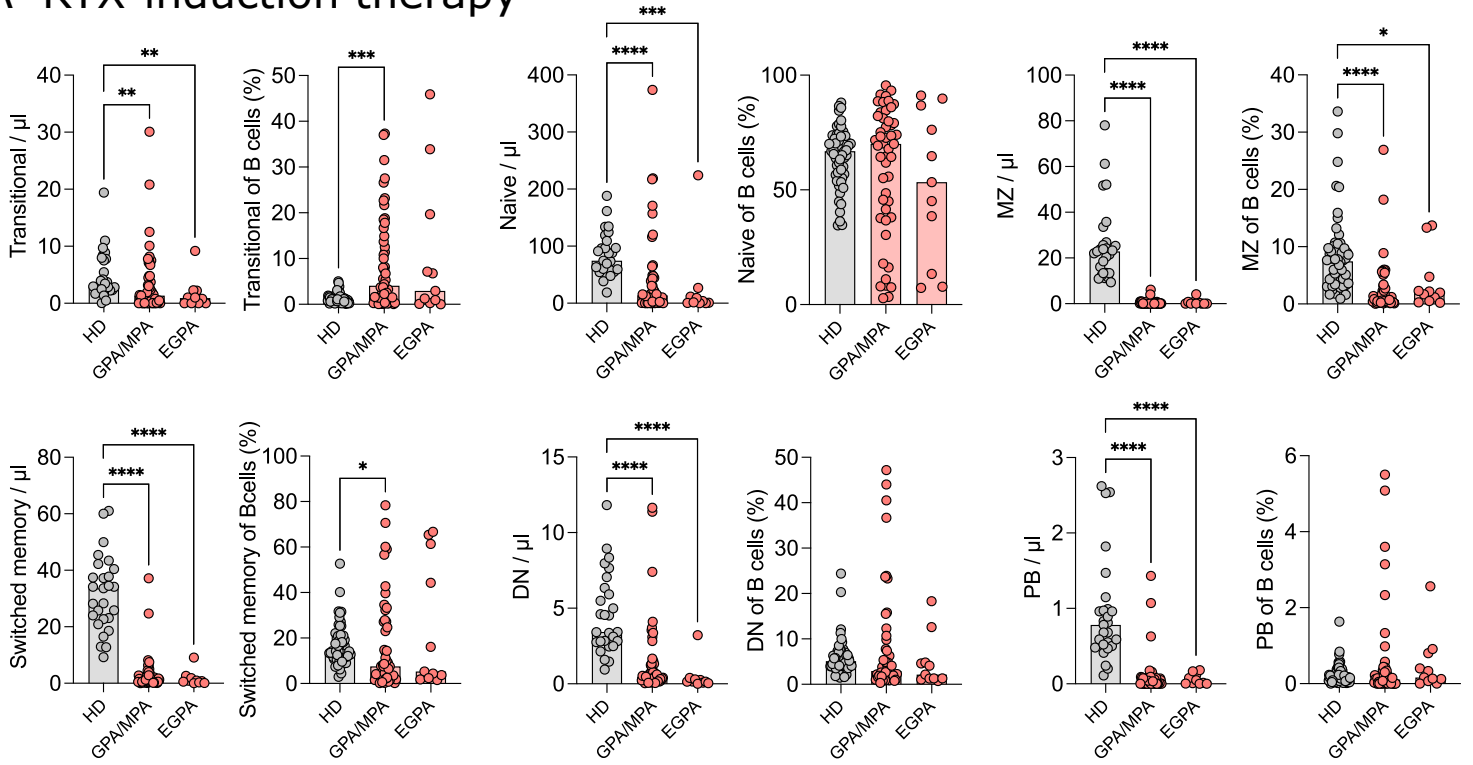

# B

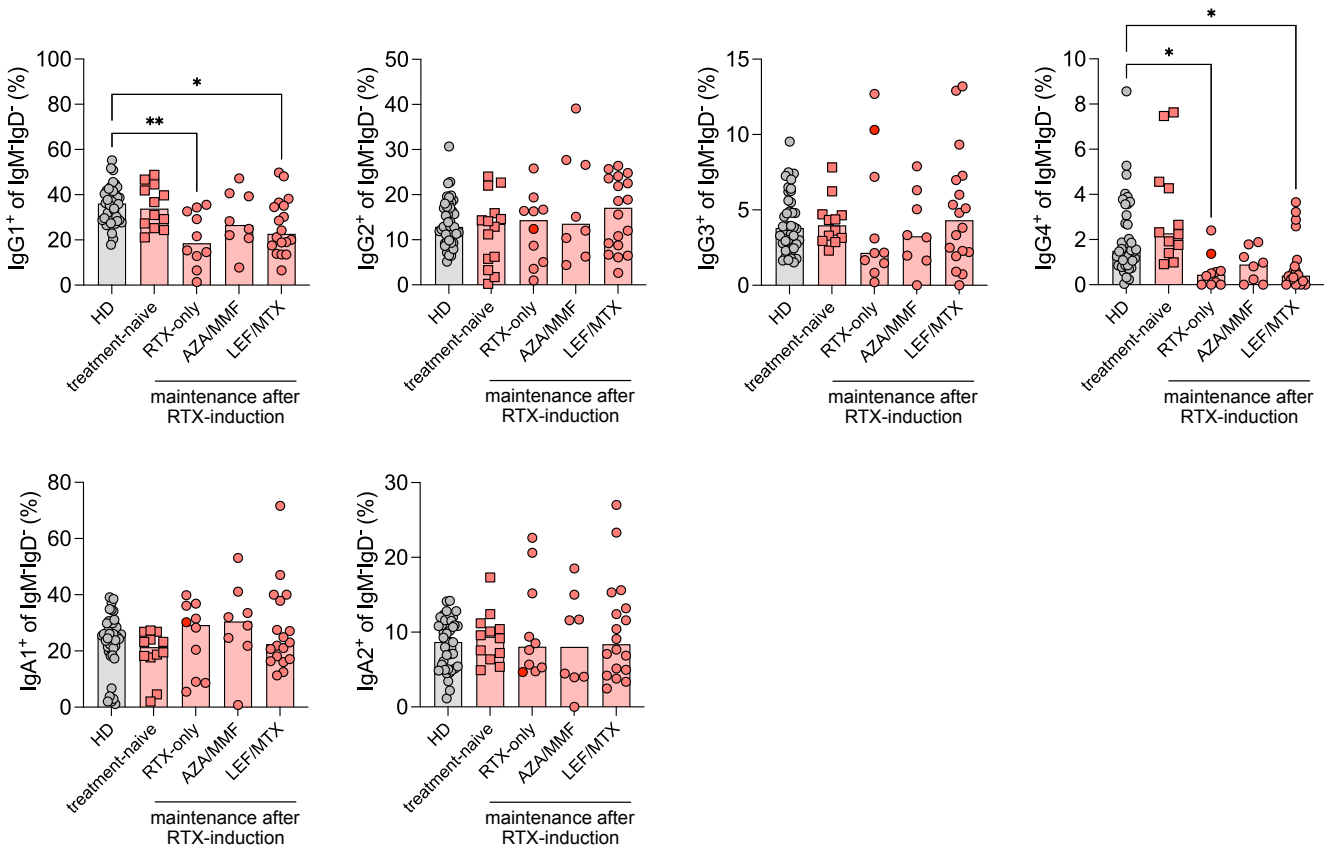

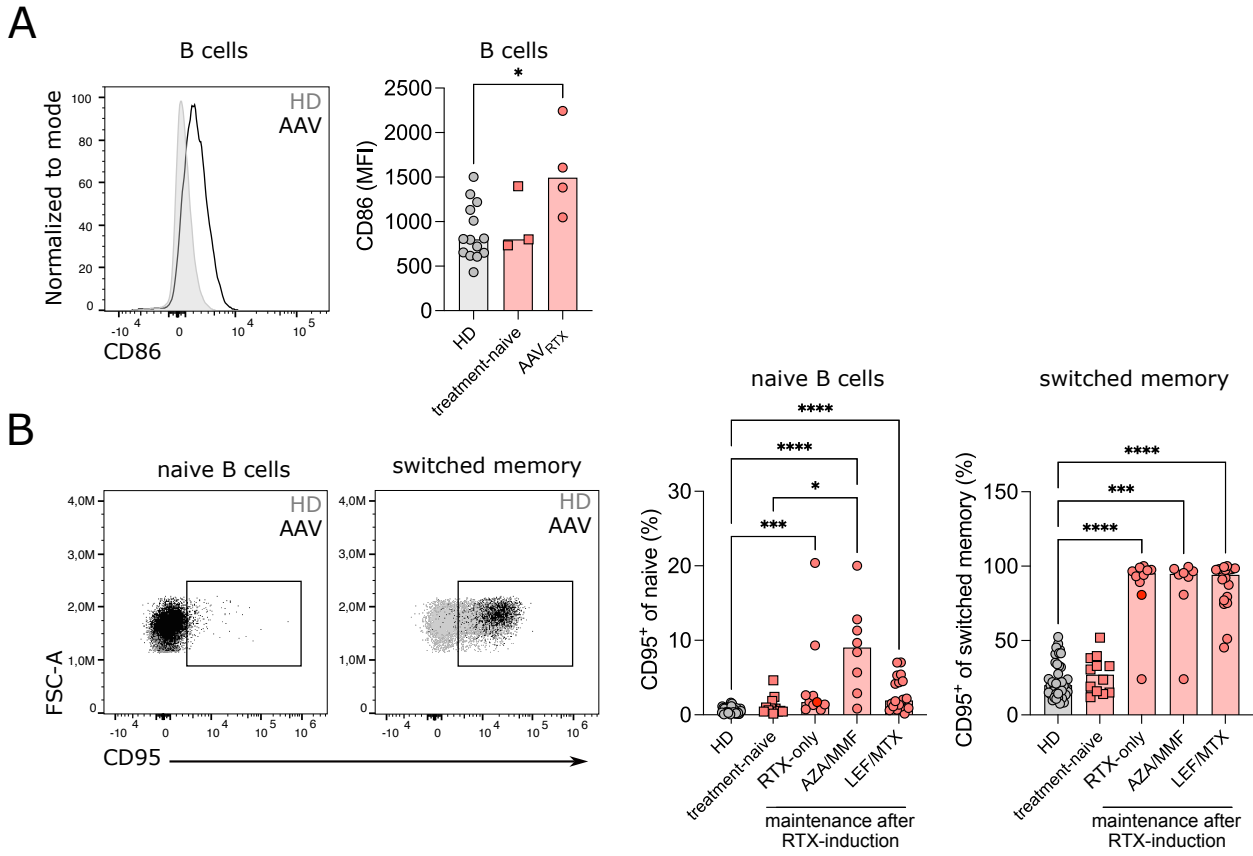

# A CyTOF

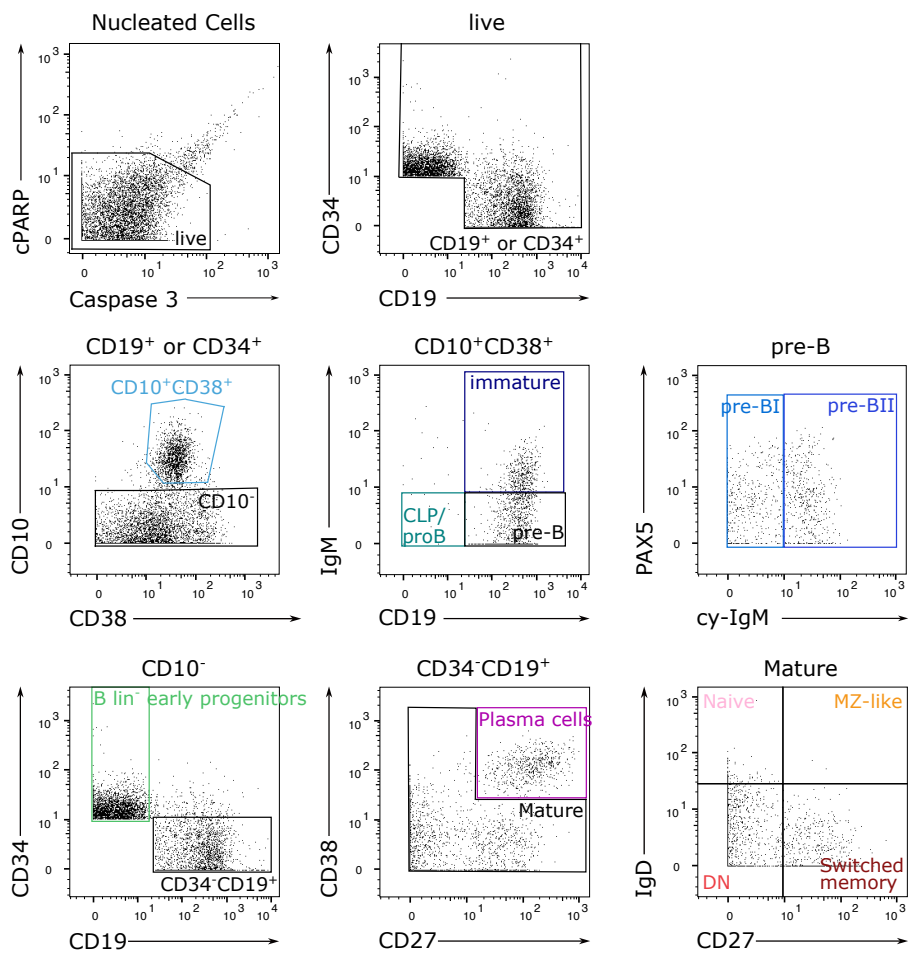

# B Flow Cytometry

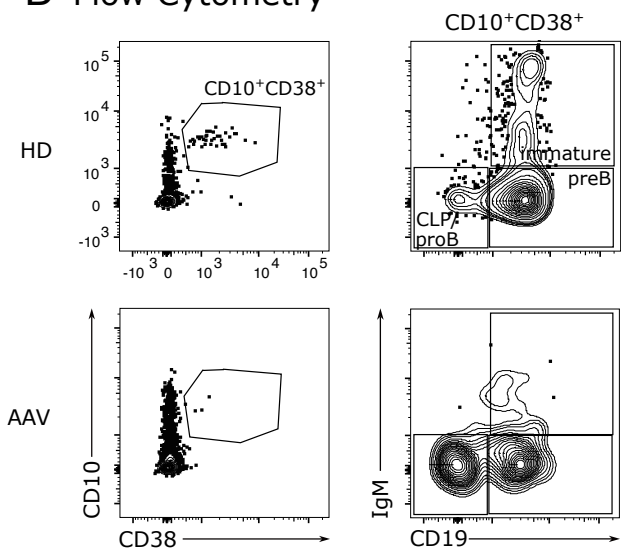

# C

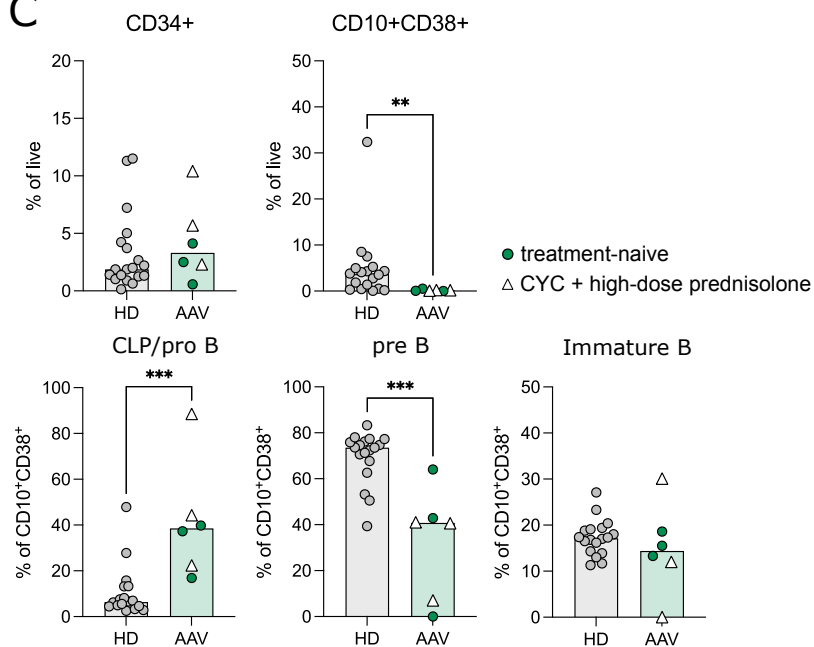

# D in vitro

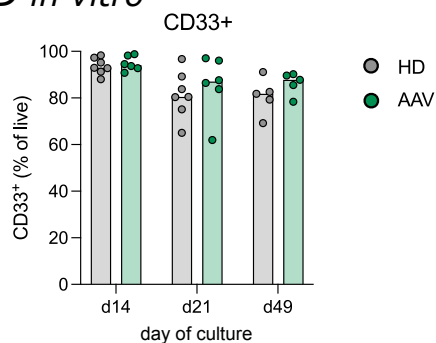

**A**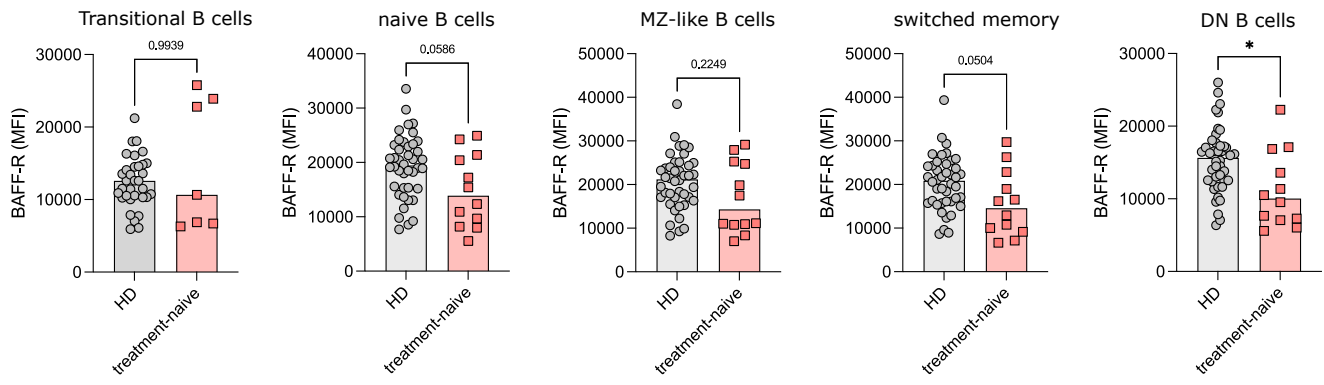**B**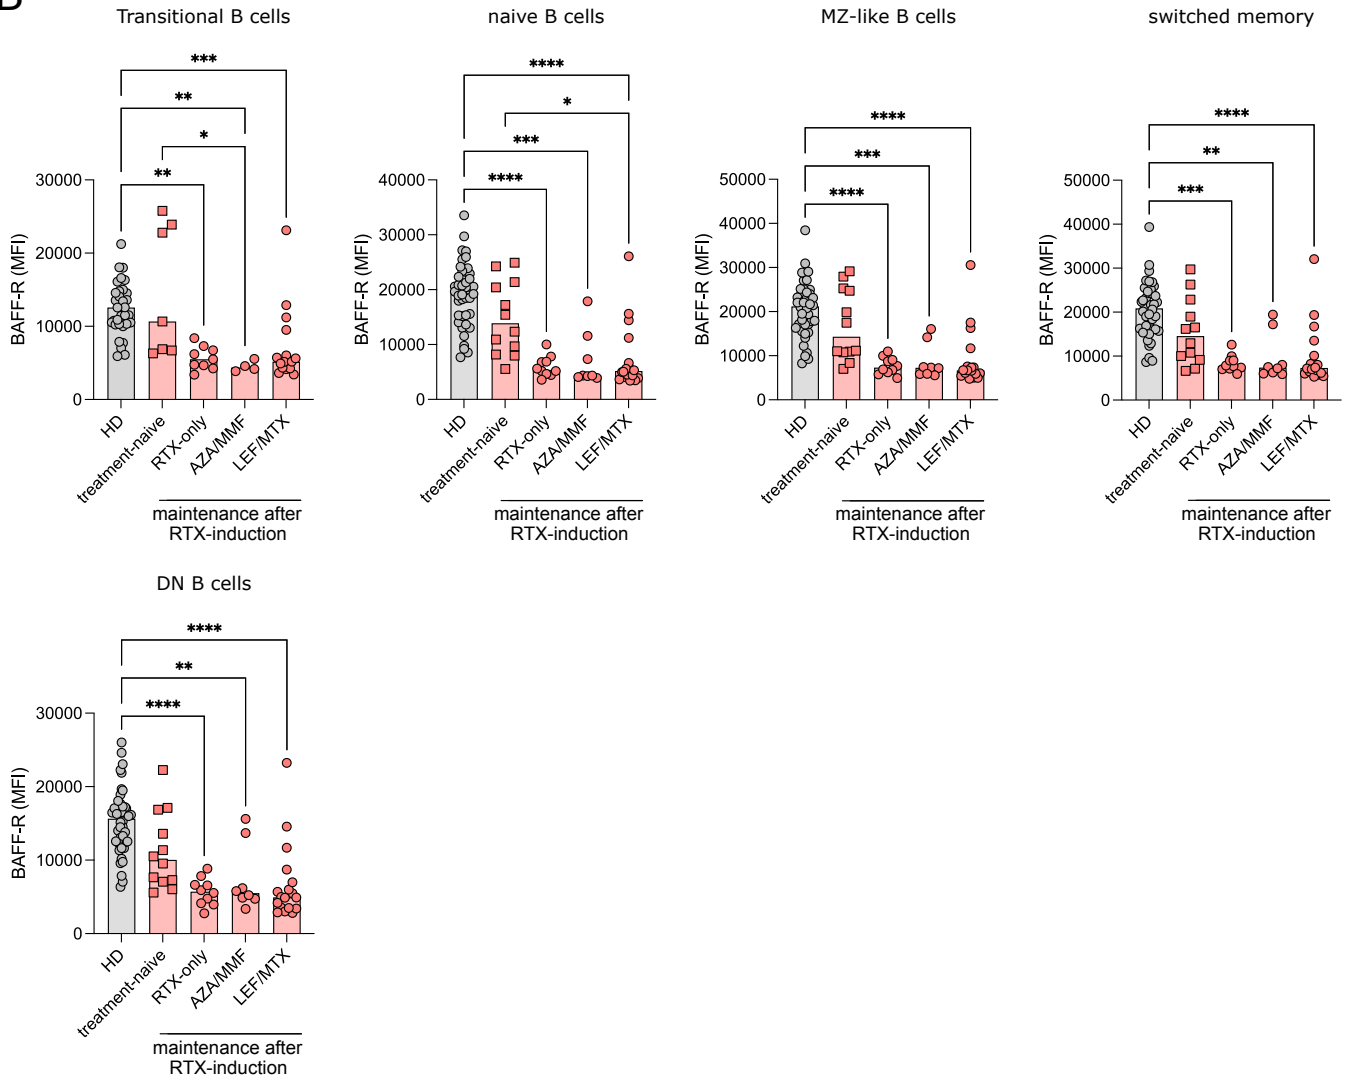**C**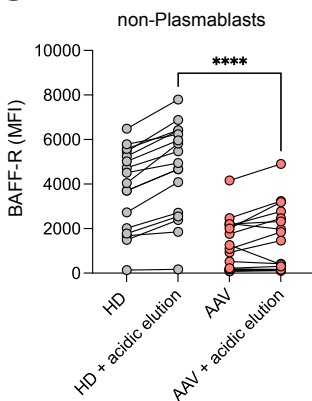

Supplement: ard-83-11-s001.pdf [file ard-83-11-s001.pdf]
